# Supplementary material for: Histone Demethylase KDM4B Promotes DNA Damage by Activating Long Interspersed Nuclear Element-1
Source: Oxford University Press journal article supplement (doi:10.1158/0008-5472.can-18-1310), 2018-11-20
Supplement: 00085472can181310-sup-200968_2_supp_5120846_ph5m88.docx [file 00085472can181310-sup-200968_2_supp_5120846_ph5m88.docx]

**Table S1. List of quantitative RT-PCR primers used in this study**

| Primer Names | Sequences(5’-to-3’) |
| --- | --- |
| ORF1-mRNA-F | **CTGGAAACTGTAAAATGC** |
| ORF1-mRNA-R | **CTCAGCTCGTCAAAGTCA** |
| ORF2- mRNA-F | **ACAAACCCACAGCCAATA** |
| ORF2- mRNA-R | **TTTCCTTCTCCTGCCTAA** |
| GAPDH-F | **TGCACCACCAACTGCTTAGC** |
| GAPDH-R | **GGCATGGACTGTGGTCATGAG** |
| 5’-UTR-CNV-F  5’-UTR-CNV-R  ORF1-CNV-F  ORF1-CNV-R | **ATAACCAATACAGAGAAGTGCTTAAA**  **GCTTCTGCATTCTTCACGTAGTTC**  **AAACCAAGGCTCGAGAACTACGT**  **CATTGCTGATACCCTTTCTTCCA** |
| ORF2-CNV-F  ORF2-CNV-R  SATA-F  SATA-R  HERVH-F  HERVH-R | **TGCGGAGAAATAGGAACACTTTT**  **TGAGGAATCGCCACACTGACT**  **GGTCAATGGCAGAAAAGGAAAT**  **CGCAGTTTGTGGGAATGATTC**  **AATGGCCCCACCCCTATCT**  **GCGGGCTGAGTCCGAAA** |

**Table S2**. **List of ChIP-qPCR primers used in this study**

| Primer Names | Sequences(5’-to-3’) |
| --- | --- |
| L1P4A-F | **TGAGACACGTCCCATCAATACCT** |
| L1P4A-R | **GGATGCAAGGCTGCTTCAATATG** |
| L1P6A-F | **TCATCTACGACCATCTGCTCTT** |
| L1P6A-R | **TCTGTATCAGGTGTAAGGAAGGA** |

**Table S3. Distribution of H3K9me3 ChIP-seq peaks in various types of human cancer cells**

| **GSM number** | **Cell**  **line** | **LINE**  **/total(%)** | **SINE**  **/total(%)** | **LTR**  **/total(%)** | **Intergenic**  **/total(%)** | **Intron**  **/total(%)** | **Exon**  **/total(%)** | **Promoter**  **/total(%)** | **Satellite**  **/total(%)** | **Simple-repeat**  **/total(%)** | **TTS**  **/total(%)** |
| --- | --- | --- | --- | --- | --- | --- | --- | --- | --- | --- | --- |
| **GSM2101438** | **H358** | **23.95** | **5.96** | **12.17** | **31.58** | **16.82** | **0.46** | **0.38** | **3.47** | **0.61** | **0.43** |
| **GSM1003480** | **Hela** | **19.83** | **5.32** | **18.06** | **23.78** | **20.05** | **3.05** | **0.96** | **1.82** | **2.62** | **0.97** |
| **GSM607493** | **K562** | **29.71** | **6.72** | **30.31** | **15.02** | **10.39** | **2.01** | **1.13** | **0.92** | **3.05** | **0.73** |
| **GSM2481427** | **Calu3** | **19.14** | **5.89** | **22.89** | **22.47** | **17.63** | **3.39** | **1.18** | **1.61** | **1.08** | **0.92** |

**Table S3.**

Genomic analysis revealed the distribution of H3K9me3 ChIP-seq peaks in various types of human cancer cells, including non-small cell lung cancer (H358), cervical cancer (HeLa) lung myelogenous leukemia (K562), adenocarcinoma (Calu3) cell lines. The H3K9me3 peaks were heavily annotated into the LINE-1 element in all of the cell line, which is similar to the observation in MCF7.


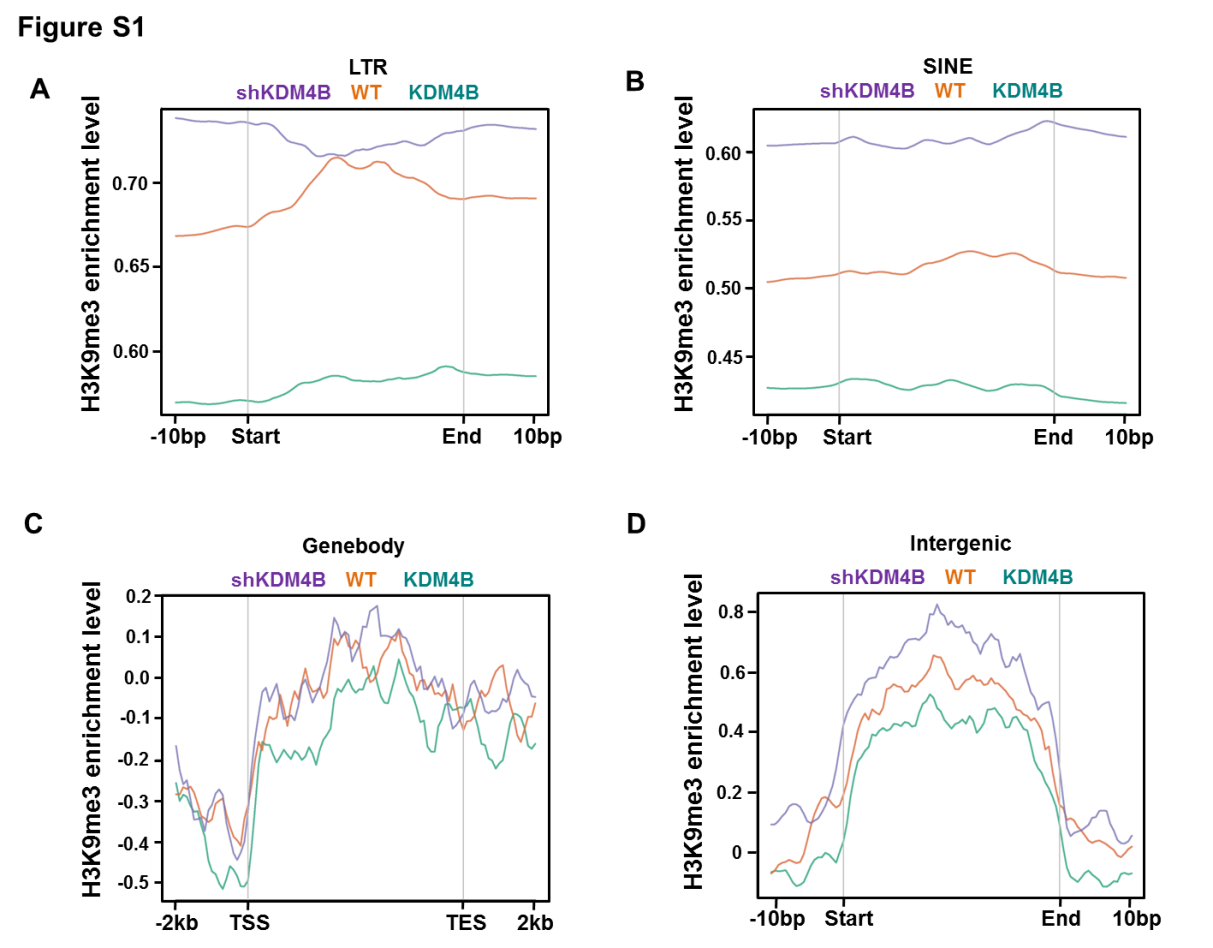


**Figure S1.**

Enrichment profile plots of the KDM4B-dependent H3K9me3 peaks overlapped SINE, LTR, genebody and intergenic in three cell types.


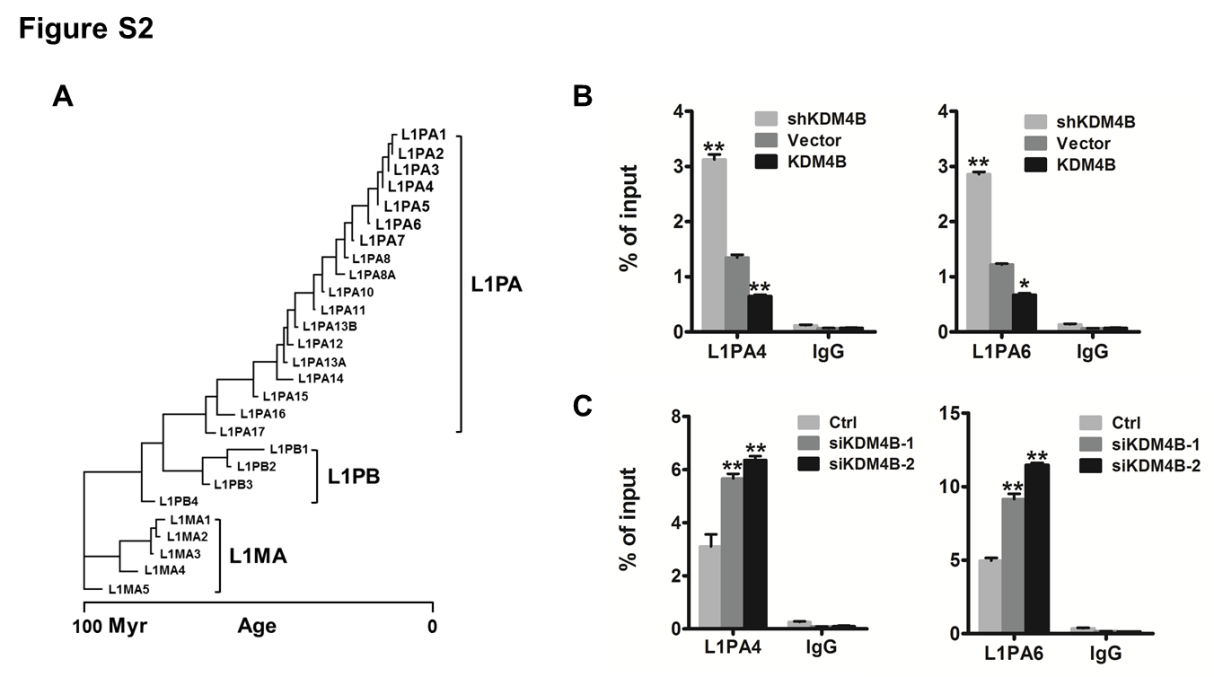


**Figure S2. The LINE-1 phylogenetic tree and the evaluation of H3K9me3 signal in selected evolutionarily young LINE-1 element.**

A**,** The LINE-1 phylogenetic tree was built by ORF1 and ORF2 consensus sequence, The species in red stand for the evolutionarily young LINE-1 element X axis represents time over 100 million years. Myr, million years.

B**,** ChIP with H3K9me3 was conducted in 293T stable cell lines, the KDM4B-dependent H3K9me3 alterations on full-length LINE-1 elements were verified by the two representative examples of full-length LINE-1 elements (L1PA4, L1PA6) were confirmed by ChIP-qPCR analysis. ChIP-qPCR data are represented as mean ± SD from three biological replicates. *, P < 0.05; **, P < 0.01; *t-*test.

C**,** KDM4B in breast cancer cell line T47D were knocked down with two distinct siRNAs, ChIP-qPCR were performed to evaluate the H3K9me3 erichment on selected LINE-1 elements (L1PA4, L1PA6). ChIP-qPCR data are represented as mean ± SD from three biological replicates. **, P < 0.01; *t-*test.


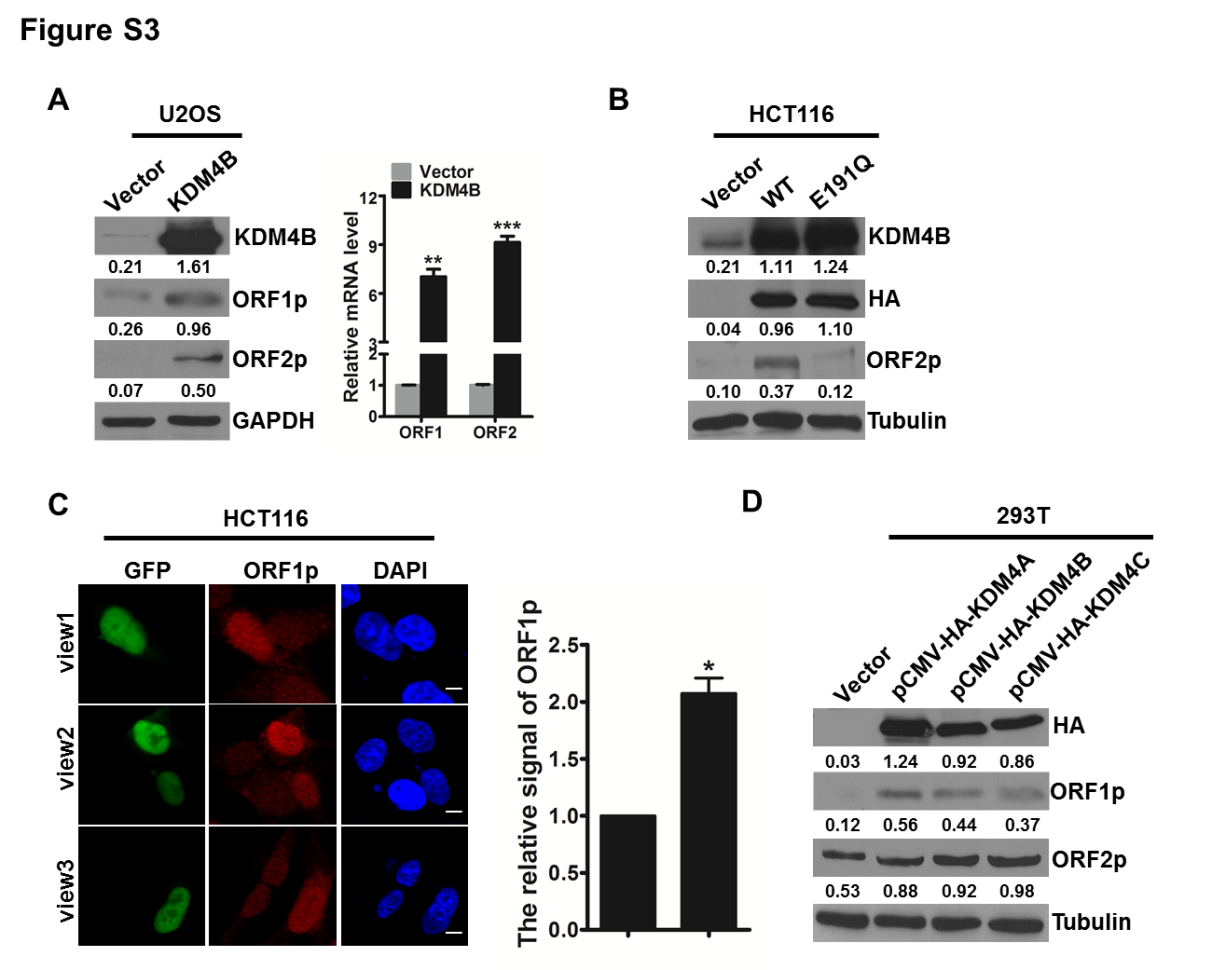


**Figure S3.Effect of KDM4 proteins on LINE-1 expression**

**A,** Immunoblots and quantitative RT-PCR showing increased protein and mRNA levels of ORF1 and ORF2 in U2OS cells stably overexpressing KDM4B. Quantitative RT-PCR data are represented as mean ± SD from three biological replicates. **, P < 0.01; ***P < 0.001; *t*-test.

**B,** Ectopic wild-type KDM4B but not the catalytic dead mutant KDM4B (E191Q) promoted ORF1p expression in HCT116 cells.

**C,** Indirect immunofluorescence microscopy was performed in HCT116 cells transfected with phage-EGFP-KDM4B or vector. GFP (green), ORF1p (red), and DAPI (blue). The relative signal of ORF1p was measured and shown in the bar graph. Scale bars, 5 μm. Immunofluorescence microscopy was repeated three times. The immunofluorescence intensity of red signal was set relative to the cell without GFP, *, P < 0.05; *t-*test.

**D,** Immunoblots showing elevated ORF1p and ORF2p expression in the presence of KDM4A-C overexpression in 293T cells. KDM4A-C expression was detected by probing the HA tag.


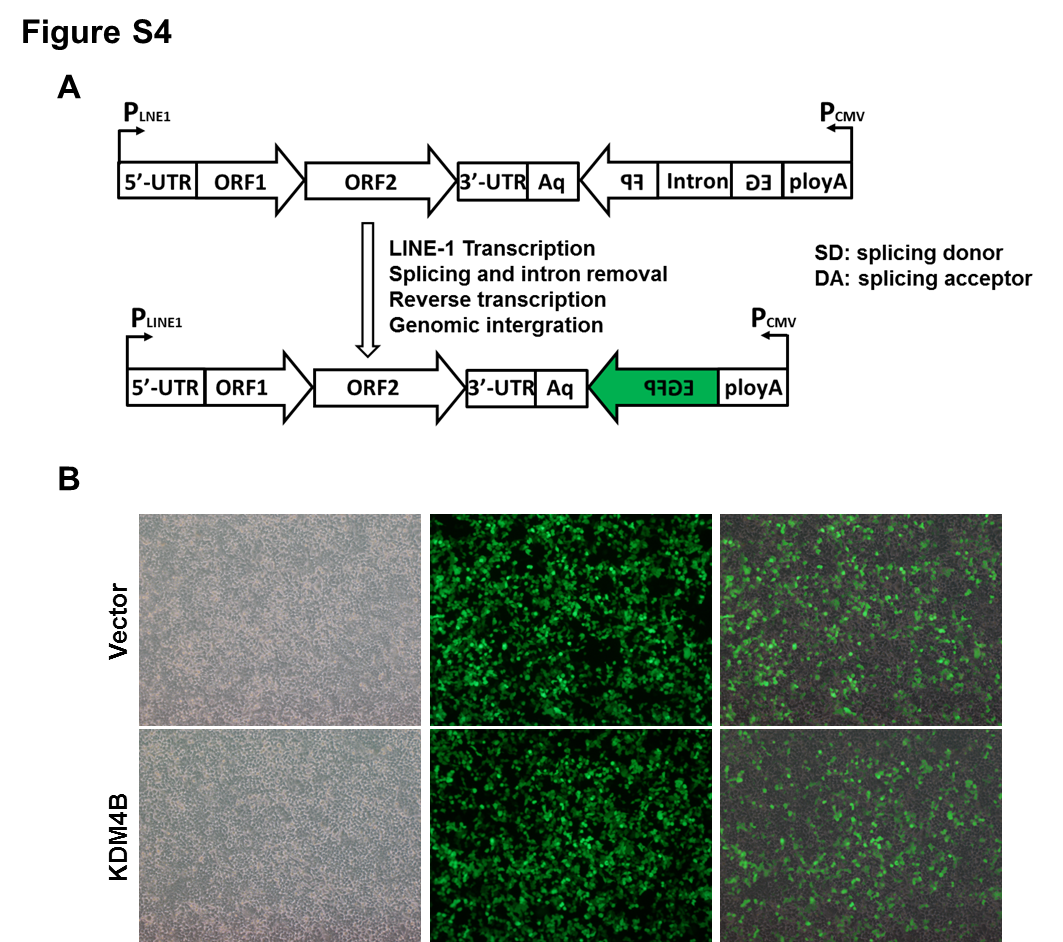


**Figure S4.Schematic illustration of retrotransposition cassette assay**

**A,** Diagram of the retrotransposition cassette assay. Successful retrotransposition of the cassette will remove the intron and activate the EGFP gene, allowing new retrotransposition events to be observed.

**B,** The transfection efficiency of 293T cells overexpressing KDM4B or vector was adjusted by transfection with EGFP-N1 and detected under a fluorescence microscope (magnification, ×100) 2 days after transfection.


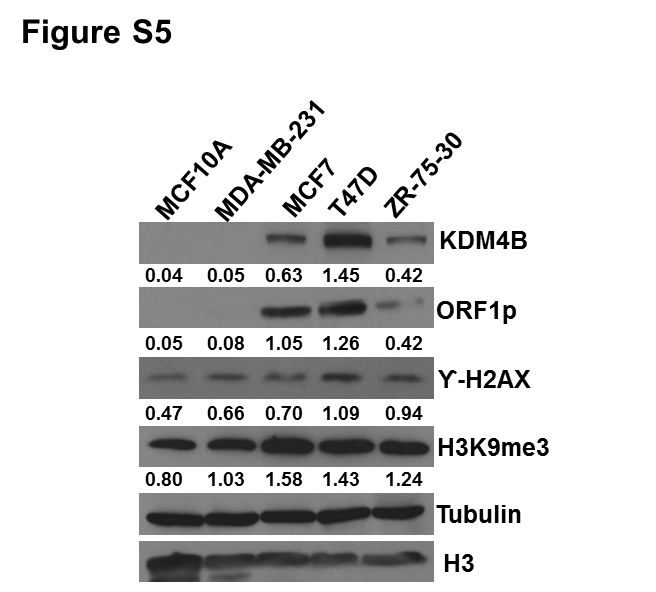


**Figure S5. The ORF1p, global H3K9me3 and DNA damage level were detected in various breast cell lines.**


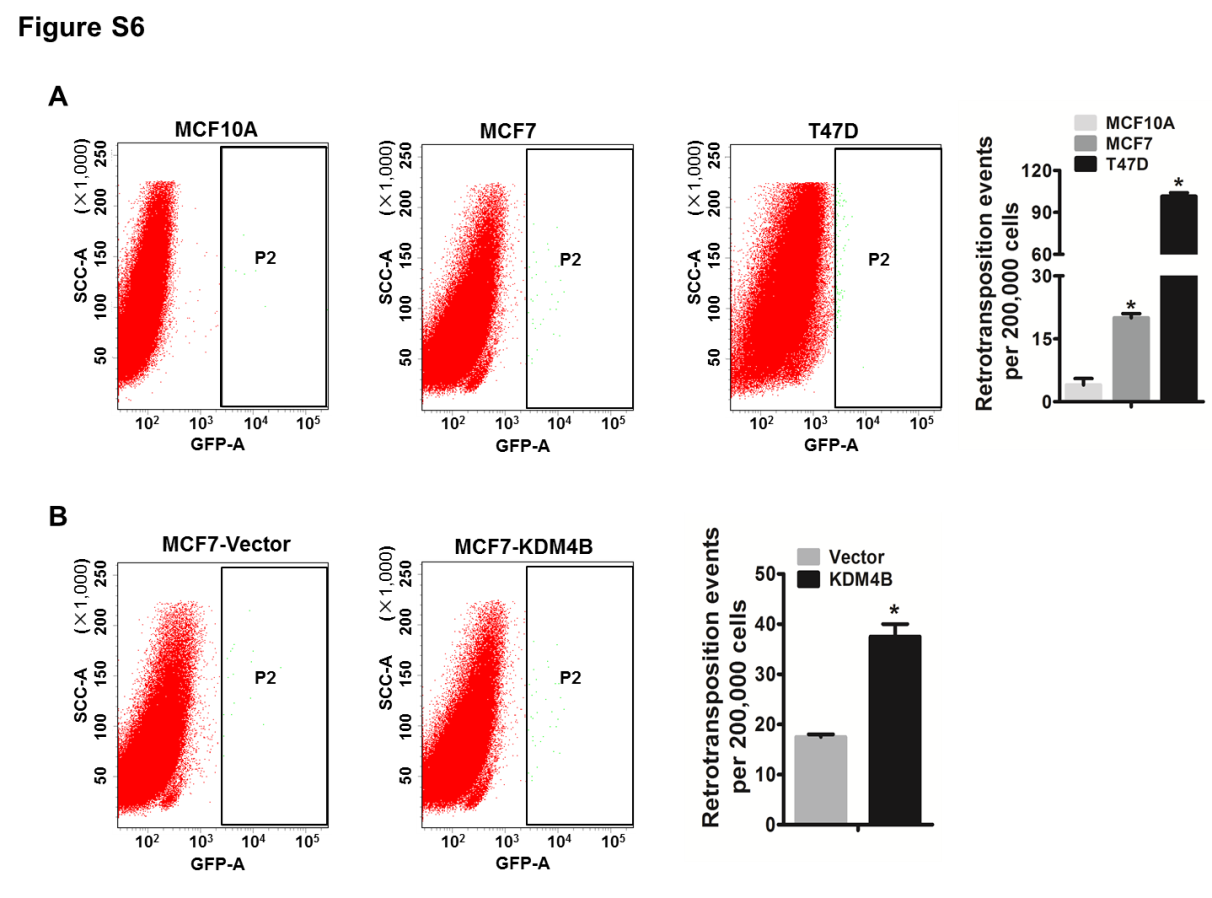


**Figure S6. The retrotransposition cassette assay in breast cancer cells and normal breast epithelial cells.**

LINE-1 retrotransposition activity of breast cells including MCA10A, MCF7, T47D and MCF7 stable cell lines were conducted by a FACS Aria III (BD Biosciences) using red-versus-green fluorescence plots. For each sample, 200,000 cells were scored. Quantitatively measuring the retrotransposition events by flow cytometry with or without the KDM4B overexpression in three independent experiments, *P < 0.05; t-test.


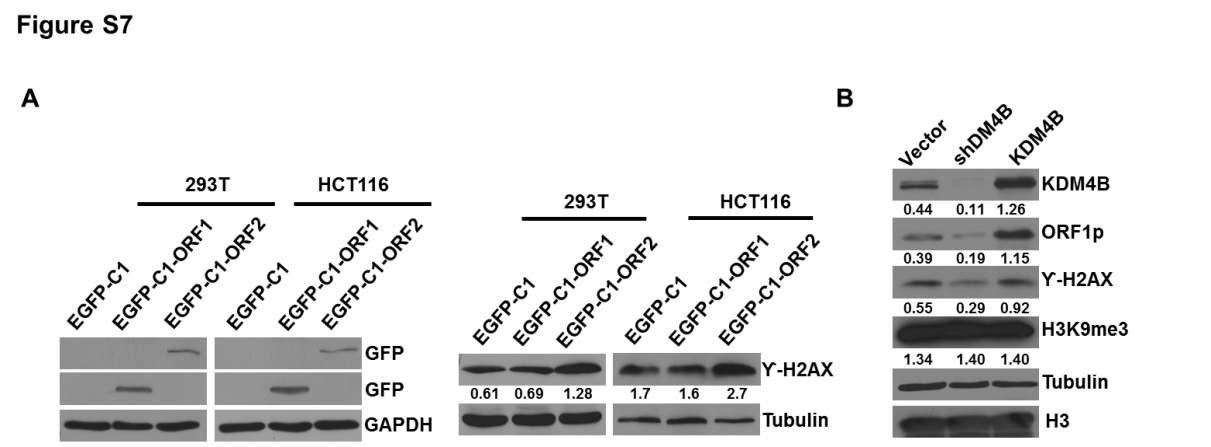


**Figure S7.ORF2 expression is sufficient to induce the DNA damage**

**A,** ORF1 and ORF2 constructs were cloned into the pEGFP-C1 vector harboring a GFP-tag and used to transfect 293T and HCT116 cells. The DNA damage level was determined by examining ϒ-H2AX.

**B**, The ORF1p, global H3K9me3 and DNA damage level were detected in 293T stable cell lines.
